# Supplementary material for: A functionalized graphene oxide and nano-zeolitic imidazolate framework composite as a highly active and reusable catalyst for [3 + 3] formal cycloaddition reactions
Source: Royal Society of Chemistry journal article supplement (doi:10.1039/c5ta03008k), 2015-01-01
Supplement: c5ta03008k1.pdf [file c5ta03008k1.pdf]

## *Supporting Information*

### **A Functionalized Graphene Oxide and Nano Zeolitic Imidazolate Frameworks Composite as Highly Active and Reusable Catalyst for [3+3] Formal Cycloaddition Reactions**

Yongyi Wei, Zhongkai Hao, Fang Zhang and Hexing Li

*The Education Ministry Key Lab of Resource Chemistry and Shanghai Key  
Laboratory of Rare Earth Functional Materials, Shanghai Normal University,  
Shanghai 200234, P. R. China*

\*To whom correspondence should be addressed. Email: [zhangfang@shnu.edu.cn](mailto:zhangfang@shnu.edu.cn);

[Hexing-Li@shnu.edu.cn](mailto:Hexing-Li@shnu.edu.cn)

Table S1. Elemental analysis of different samples.

| Sample                            | N (wt.%) | C (wt.%) | S (wt.%) | H (wt.%) |
|-----------------------------------|----------|----------|----------|----------|
| GO                                | /        | 50.1     | 0.105    | 2.86     |
| SO <sub>3</sub> H-GO              | /        | 63.6     | 1.75     | 1.85     |
| ZIF-8@ SO <sub>3</sub> H-GO-1     | 17.4     | 51.4     | 1.05     | 3.83     |
| ZIF-8@ SO <sub>3</sub> H-GO-2     | 13.7     | 56.8     | 0.845    | 3.41     |
| ZIF-8@ SO <sub>3</sub> H-GO-3     | 9.32     | 62.7     | 0.507    | 2.67     |
| used ZIF-8@SO <sub>3</sub> H-GO-2 | 13.2     | 57.0     | 0.836    | 3.39     |

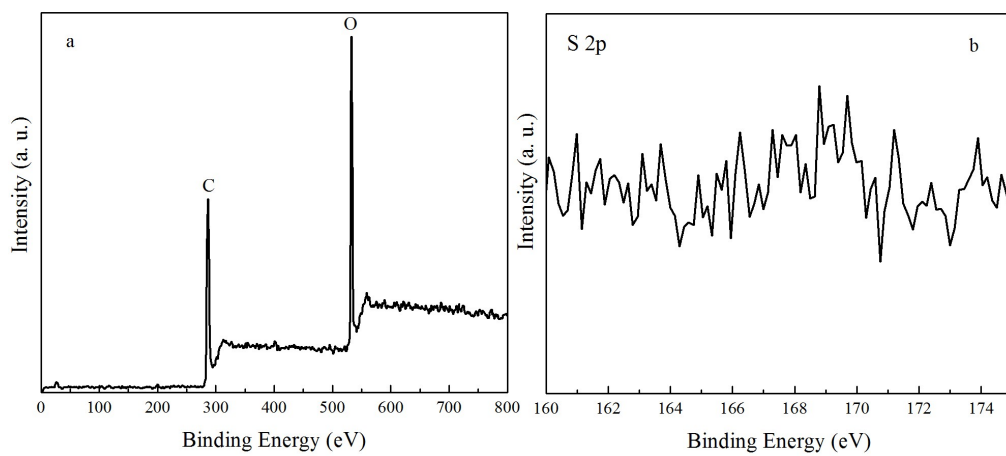

Figure S1. XPS spectrum of GO (a) and S 2p XPS spectrum of GO (b).

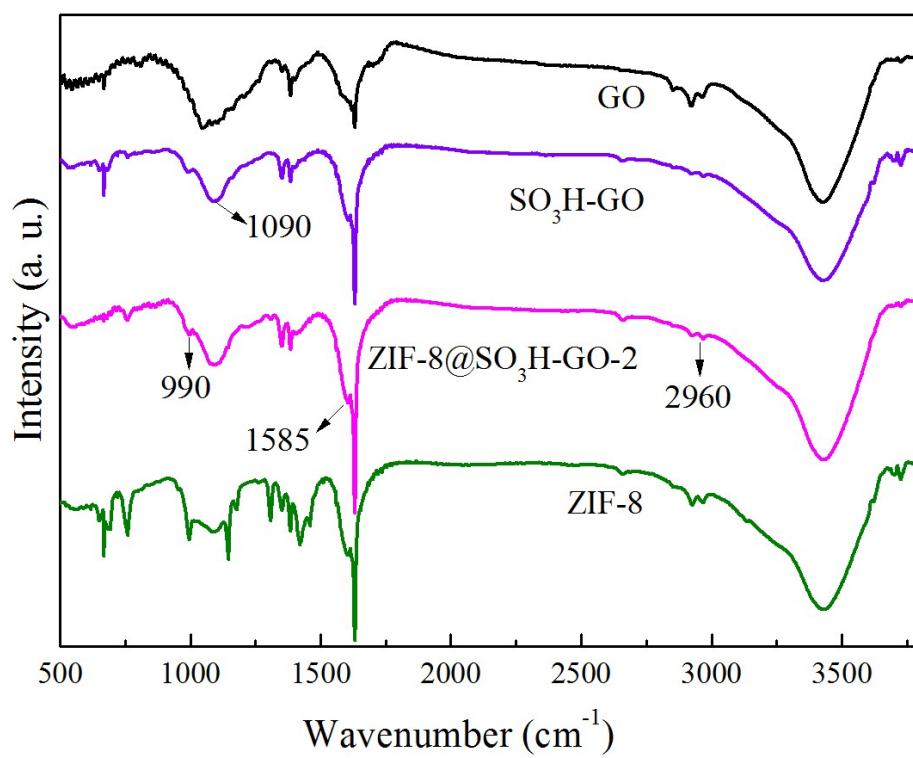

Figure S2. FTIR spectra of GO, SO<sub>3</sub>H-GO, ZIF-8@SO<sub>3</sub>H-GO-2 and ZIF-8 samples.

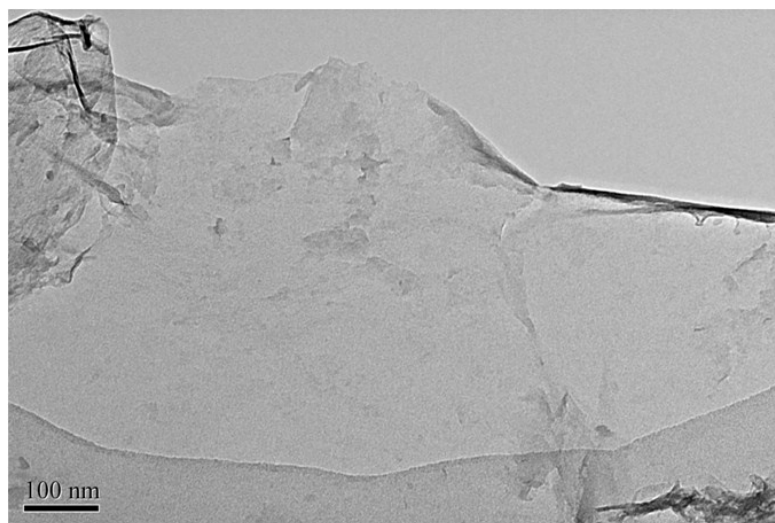

Figure S3. TEM image of SO<sub>3</sub>H-GO sample.

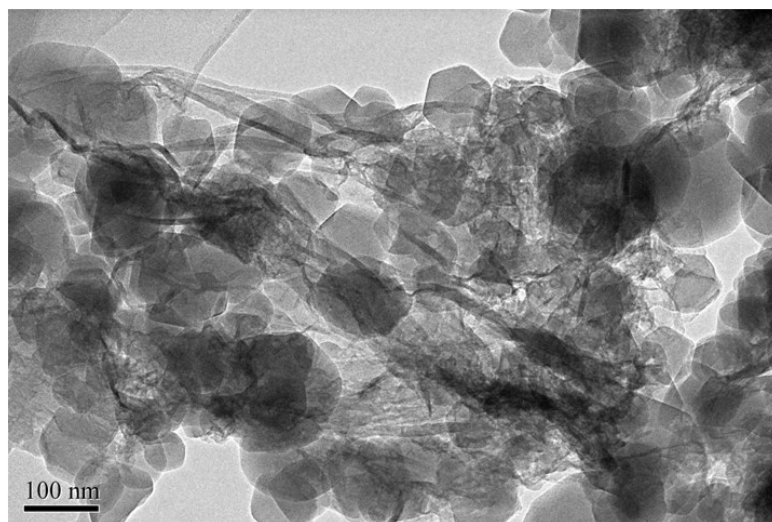

Figure S4. TEM image of ZIF-8@SO<sub>3</sub>H-GO-2 catalyst after being reused for 10 times.
